# Supplementary material for: Liprobe, a vital dye for lipid aggregates detection in imaging and high-content screens
Source: Frontiers journal article supplement (doi:10.3389/fphot.2022.963778), 2022-08-15
Supplement: Table_1.DOCX [file Table_1.DOCX]

Supplementary Material

Liprobe, a vital dye for lipid aggregates detection in imaging and high-content screens

Sandra I. Vieira,a,† Raquel Nunes da Silva,a,b,† Mariana Alves,a Roberto A. Dias,a Ana M. Meireles Sousa,c Fatima Camões,a André Maia,d Mónica Almeida,e João Rocha,f Artur M. S. Silva,b and Samuel Guieu b,f

a Institute of Biomedicine iBiMED, Department of Medical Sciences, University of Aveiro, 3810-193 Aveiro, Portugal. E-mail: sivieira@ua.pt; robertodias@ua.pt; marianaqalves@ua.pt; fatimacamoes@ua.pt

b LAQV-REQUIMTE, Department of Chemistry, University of Aveiro, 3810-193. E-mail: rsons@ua.pt; artur.silva@ua.pt; sguieu@ua.pt

c Department of Developmental Biology, Stanford University School of Medicine, Stanford, CA 94305, USA. E-mail: amsousa@stanford.edu

d i3S – Instituto de Investigação e Inovação em Saúde, Universidade do Porto, Porto, Portugal, IBMC – Instituto de Biologia Molecular e Celular, Universidade do Porto, Porto, Portugal. E-mail: andre.maia@i3s.up.pt

e CESAM, Department of Biology, University of Aveiro, 3810-193. E-mail: monica.alm@ua.pt

f CICECO, Department of Chemistry, University of Aveiro, 3810-193 Aveiro, Portugal. E-mail: rocha@ua.pt

† The authors contributed equally to this work.

**Corresponding authors**

João Rocha: [rocha@ua.pt](mailto:rocha@ua.pt)

Sandra Vieira (biomedicine): [sivieira@ua.pt](mailto:sivieira@ua.pt) ; phone: +351 234247256

Samuel Guieu (chemistry): [sguieu@ua.pt](mailto:sguieu@ua.pt);

[1 Material and methods and NMR spectra for the Chemical Part 3](#_Toc105504993)

[1.1 Synthesis and characterization of compounds 1a-c and 2a-c 3](#_Toc105504994)

[1.1.1 General 3](#_Toc105504995)

[1.1.2 General procedure 3](#_Toc105504996)

[1.1.3 (1*E*,4*E*)-1,5-Bis[4-(dimethylamino)phenyl]penta-1,4-dien-3-one (1a) 3](#_Toc105504997)

[1.1.4 (1*E*,4*E*)-1,5-Bis[3-chloro-4-(dimethylamino)phenyl]penta-1,4-dien-3-one (1b) 4](#_Toc105504998)

[1.1.5 (1*E*,4*E*)-1,5-Bis[3-bromo-4-(dimethylamino)phenyl]penta-1,4-dien-3-one (1c) 4](#_Toc105504999)

[1.1.6 (2*E*,6*E*)-2,6-Bis[4-(dimethylamino)benzylidene]cyclohexanone (2a) 4](#_Toc105505000)

[1.1.7 (2*E*,6*E*)-2,6-Bis[3-chloro-4-(dimethylamino)benzylidene]cyclohexanone (2b, Liprobe) 4](#_Toc105505001)

[1.1.8 (2*E*,6*E*)-2,6-Bis[3-bromo-4-(dimethylamino)benzylidene]cyclohexanone (2c) 5](#_Toc105505002)

[1.2 Crystallography 5](#_Toc105505003)

[1.3 NMR spectra 6](#_Toc105505004)

[1.3.1 (1*E*,4*E*)-1,5-Bis[4-(dimethylamino)phenyl]penta-1,4-dien-3-one (1a) 6](#_Toc105505005)

[1.3.2 (1*E*,4*E*)-1,5-Bis[3-chloro-4-(dimethylamino)phenyl]penta-1,4-dien-3-one (1b) 7](#_Toc105505006)

[1.3.3 (1*E*,4*E*)-1,5-Bis[3-bromo-4-(dimethylamino)phenyl]penta-1,4-dien-3-one (1c) 8](#_Toc105505007)

[1.3.4 (2*E*,6*E*)-2,6-Bis[4-(dimethylamino)benzylidene]cyclohexanone (2a) 9](#_Toc105505008)

[1.3.5 (2*E*,6*E*)-2,6-Bis[3-chloro-4-(dimethylamino)benzylidene]cyclohexanone (2b, Liprobe) 10](#_Toc105505009)

[1.3.6 (2*E*,6*E*)-2,6-Bis[3-bromo-4-(dimethylamino)benzylidene]cyclohexanone (2c) 11](#_Toc105505010)

[2 Supplementary figures, material and methods for the Biological Part 12](#_Toc105505011)

[2.1 Supplementary Figures S1-S6 12](#_Toc105505012)

[2.2 Compounds’ cellular fluorescence and distribution (HeLa cells) 15](#_Toc105505013)

[2.3 Cytotoxicity assays 16](#_Toc105505014)

[2.4 Confocal lambda scans in HeLa cells 16](#_Toc105505015)

[2.5 Compound 2b staining in different mammalian cell lines 16](#_Toc105505016)

[2.6 Co-localization of compound 2b with MitoTracker and LAMP2 17](#_Toc105505017)

[2.7 Induction of lipid droplets by oleic acid incubation 17](#_Toc105505018)

[2.8 Zebrafish biocompatibility and staining with compound 2b 18](#_Toc105505019)

[2.9 Quantification of triglycerides in solution 18](#_Toc105505020)

[2.10 High-Content Screening of human fibroblasts 18](#_Toc105505021)

[2.11 Mass spectrometry analysis of the proteome of cells exposed to compound 2b 19](#_Toc105505022)

[2.12 Long-term 2b intracellular staining and its effects on cells viability 20](#_Toc105505023)

[3 References 20](#_Toc105505024)

# Material and methods and NMR spectra for the Chemical Part

## Synthesis and characterization of compounds 1a-c and 2a-c

### General

Melting points were measured in a Reichert Thermovar apparatus fitted with a microscope and are uncorrected. NMR spectra were recorded with Bruker DRX 300 and 500 spectrometers (300 MHz or 500 MHz for 1H and 75 MHz or 125 MHz for 13C), in CDCl3 as solvent, if not stated otherwise. Chemical shifts (δ) are reported in ppm and coupling constants (*J*) in Hz; internal standard was residual peak of the solvent. High-resolution mass spectra analysis (HRMS-ESI) were performed on a microTOF (focus) mass spectrometer. Ions were generated using an ApolloII (ESI) source. Ionization was achieved by electrospray, using a voltage of 4500 V applied to the needle, and a counter voltage between 100 and 150 V applied to the capillary. Absorption spectra were collected with UV-2501PC, emission and excitation spectra were collected with FluoroMax-3. All reagents were purchased from Aldrich and used without any further purification. Solvents of commercial grade were used as received unless otherwise stated.

### General procedure

Sodium hydroxide (2 equiv) was added to a solution of the benzaldehyde derivative (2 equiv) and the ketone (1 equiv) in absolute ethanol, and the resulting solution was stirred at room temperature for 2-4 h. The solvent was then evaporated, and the residue was purified by silica gel flash column chromatography (eluent: CH2Cl2/MeOH, 95/5).

### (1*E*,4*E*)-1,5-Bis[4-(dimethylamino)phenyl]penta-1,4-dien-3-one (1a)

*Reference for this compound*: G. Liang, X. Li, L. Chen, S. Yang, X. Wu, E. Studer, E. Gurley, P. B. Hylemon, F. Ye, Y. Li, H. Zhou, *Bioorg. Med. Chem. Lett*. **2008**, *18*, 1525-1529.

Red solid, 31%. mp 193-195 ºC (lit. 185 ºC). 1H NMR (300.13 MHz, CDCl3, 25 ºC): δ 7.69 (d, 3*J*H-H 15.7 Hz, 2H, H-β), 7.52 (d, 3*J*H-H 9.0 Hz, 4H, H-2,6), 6.89 (d, 3*J*H-H 15.7 Hz, 2H, H-α), 6.69 (d, 3*J*H-H 9.0 Hz, 4H, H-3,5), 3.04 (s, 12H, C*H*3).

### (1*E*,4*E*)-1,5-Bis[3-chloro-4-(dimethylamino)phenyl]penta-1,4-dien-3-one (1b)

Orange oil, 57%. 1H NMR (300.13 MHz, CDCl3, 25 ºC): δ 7.63 (d, 4*J*H-H 2.1 Hz, 2H, H-2), 7.62 (d, 3*J*H-H 15.8 Hz, 2H, H-β), 7.43 (dd, 4*J*H-H 2.1, 3*J*H-H 8.4 Hz, 2H, H-6), 7.03 (d, 3*J*H-H 8.4 Hz, 2H, H-5), 6.95 (d, 3*J*H-H 15.8 Hz, 2H, H-α), 2.89 (s, 12H, C*H*3). 13C NMR (75 MHz, CDCl3, 25ºC): δ 188.3 (*C*=O), 152.1 (*C*-N), 141.6 (*C*=C), 130.4 (*C*-H), 129.1 (*C*quat), 128.0 (*C*-H), 127.4 (*C*quat), 124.2 (*C*-H), 119.6 (*C*=C), 43.3 (*C*H3). TOF HRMS ESI Calcd. for C21H22N2O1Cl2: 388.1109 (100%), 390.1080 (65%). Found: 388.1103 (100%) (-1.5 ppm), 390.1086 (64%) (+1.5 ppm).

### (1*E*,4*E*)-1,5-Bis[3-bromo-4-(dimethylamino)phenyl]penta-1,4-dien-3-one (1c)

Orange solid, 44%. Mp 94-96 ºC. 1H NMR (300.13 MHz, CDCl3, 25 ºC): δ 7.83 (d, 4*J*H-H 2.1 Hz, 2H, aromatic H-2), 7.62 (d, 3*J*H-H 15.9 Hz, 2H, H-β), 7.48 (dd, 4*J*H-H 2.1, 3*J*H-H 8.4 Hz, 2H, H-6), 7.04 (d, 3*J*H-H 8.4 Hz, 2H, H-5), 6.95 (d, 3*J*H-H 15.9 Hz, 2H, H-α), 2.88 (s, 12H, C*H*3). 13C NMR (75 MHz, CDCl3, 25ºC): δ 188.3 (*C*=O), 153.6 (*C*-N), 141.5 (*C*=C), 133.7 (*C*-H), 129.9 (*C*quat), 128.6 (*C*-H), 124.4 (*C*quat), 120.1 (*C*-H), 118.1 (*C*=C), 43.8 (*C*H3). TOF HRMS ESI Calcd. for C21H22N2O1Br2: 476.0099 (50%), 478.0078 (100%), 480.0058 (50%). Found: 476.0103 (45%) (+0.4 ppm), 478.0080 (100%) (+0.4 ppm), 480.0066 (49%) (+1.7 ppm).

### (2*E*,6*E*)-2,6-Bis[4-(dimethylamino)benzylidene]cyclohexanone (2a)

*Reference for his compound*: G. Liang, X. Li, L. Chen, S. Yang, X. Wu, E. Studer, E. Gurley, P. B. Hylemon, F. Ye, Y. Li, H. Zhou, *Bioorg. Med. Chem. Lett*. **2008**, *18*, 1525-1529.

Red solid, 95%. Mp 239-241 ºC (lit. 160 ºC). 1H NMR (300.13 MHz, CDCl3, 25 ºC): δ 7.76 (br s, 2H, C=C*H*), 7.44 (d, 3*J*H-H 8.9 Hz, 4H, H-2’,6’), 6.72 (d, 3*J*H-H 8.9 Hz, 4H, H-3’,5’), 3.02 (s, 12H, C*H*3), 3.02-2.91 (m, 4H, C*H*2), 1.85-1.77 (m, 2H, C*H*2).

### (2*E*,6*E*)-2,6-Bis[3-chloro-4-(dimethylamino)benzylidene]cyclohexanone (2b, Liprobe)

Orange solid, 75%. Mp 130-132 ºC. 1H NMR (300.13 MHz, CDCl3, 25 ºC): δ 7.68 (bs, 2H, C=C*H*), 7.50 (d, 4*J*H-H 2.0 Hz, 2H, H-2’), 7.33 (dd, 4*J*H-H 2.0, 3*J*H-H 8.4 Hz, 2H, H-6’), 7.05 (d, 3*J*H-H 8.4 Hz, 2H, H-5’), 2.93-2.87 (m, 4H, C*H*2), 2.88 (s, 12H, C*H*3), 1.85-1.77 (m, 2H, C*H*2). 13C NMR (75 MHz, CDCl3, 25ºC): δ 189.7 (*C*=O), 150.5 (*C*-N), 135.5 (*C*=C), 135.2 (*C*quat), 132.6 (*C*-H), 130.6 (*C*quat), 130.1 (*C*-H), 127.2 (*C*-H), 119.3 (*C*=C), 43.4 (*C*H3), 28.4 (*C*H2), 22.8 *(C*H2). ESI-MS: m/z: 429.2 (100%), 431.2 (60%) [M+H]+, 215.1 (80%), 216.1 (50%) [M+2H]2+. Anal. Calcd. for C24H26Cl2N2O: C, 67.13; H, 6.10; N, 6.52. Found: C, 67.26; H, 6.16, N, 6.23.

### (2*E*,6*E*)-2,6-Bis[3-bromo-4-(dimethylamino)benzylidene]cyclohexanone (2c)

Orange solid, 48%. Mp 154-156 ºC. 1H NMR (300.13 MHz, CDCl3, 25 ºC): δ 7.69 (d, 4*J*H-H 2.0 Hz, 2H, H-2’), 7.67 (br s, 2H, C=C*H*), 7.38 (dd, 4*J*H-H 2.0, 3*J*H-H 8.4 Hz, 2H, H-6’), 7.07 (d, 3*J*H-H 8.4 Hz, 2H, H-5’), 2.93-2.86 (m, 4H, C*H*2), 2.86 (s, 12H, C*H*3), 1.85-1.79 (m, 2H, C*H*2). 13C NMR (75 MHz, CDCl3, 25ºC): δ 189.7 (*C*=O), 152.0 (*C*-N), 135.8 (*C*=C), 135.3 (*C*quat), 135.2 (*C*quat), 131.3 (*C*-H), 130.6 (*C*-H), 119.8 (*C*=C), 118.0 (*C*-H), 43.9 (*C*H3), 28.4 (*C*H2), 22.8 *(C*H2). ESI-MS: m/z: 517.1 (40%), 519.1 (100%), 521.1 (40%) [M+H]+, 259.0 (50%), 260.0 (100%), 261.0 (50%) [M+2H]2+. Anal. Calcd for C24H26Br2N2O: C 55.62, H 5.06, N 5.41. Found: C 55.62, H 4.99, N 5.19%.

## Crystallography

Single-crystals with block shape of compounds **2b** and **2c** were manually selected from the crystallization vial. A suitable single-crystal was mounted on a glass fiber with the help of silicon grease. Data were collected at 180(2) K on a Bruker X8 Kappa APEX II charge-coupled device (CCD) area-detector diffractometer (Mo Ka graphite-monochromated radiation, λ = 0.71073 Å) controlled by the APEX2 software package,[[1]](#endnote-1) and equipped with an Oxford Cryosystems Series 700 cryostream monitored remotely using the software interface Cryopad.[[2]](#endnote-2) Images were processed using the software package SAINT+,[[3]](#endnote-3) and data were corrected for absorption by the multi-scan semi-empirical method implemented in SADABS.[[4]](#endnote-4) The structure was solved using the direct methods algorithm implemented in SHELXS-97,[[5]](#endnote-5) ,[[6]](#endnote-6) which allowed the immediate location of the majority of the atoms. All remaining non-hydrogen atoms were located from difference Fourier maps calculated from successive full-matrix least squares refinement cycles on *F2* using SHELXL-97.5,[[7]](#endnote-7) All non-hydrogen atoms were successfully refined using anisotropic displacement parameters.

Hydrogen atoms bound to carbon were located at their idealized positions using appropriate *HFIX* instructions in SHELXL (*43* for the aromatic and vinylic, *23* for the –CH2– moieties and *13* for the chiral tertiary carbon atoms) and included in subsequent refinement cycles in riding-motion approximation with isotropic thermal displacements parameters (*U*iso) fixed at 1.2 times *Ueq* of the atom to which they are attached.

Crystallographic data for the structures reported in this paper have been deposited with the Cambridge Crystallographic Data Centre as supplementary publication No. CCDC 1042558-1042559. Copies of the data can be obtained free of charge on application to CCDC, 12 Union Road, Cambridge CB2 2EZ, U.K. Fax: (+44) 1223 336033. E-mail: deposit@ccdc.cam.ac.uk.

## NMR spectra

### (1*E*,4*E*)-1,5-Bis[4-(dimethylamino)phenyl]penta-1,4-dien-3-one (1a)


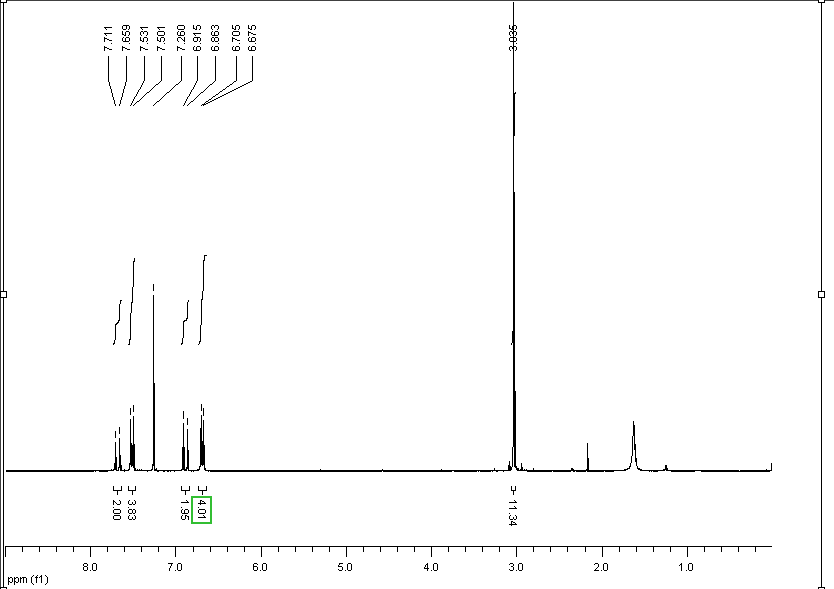


### (1*E*,4*E*)-1,5-Bis[3-chloro-4-(dimethylamino)phenyl]penta-1,4-dien-3-one (1b)


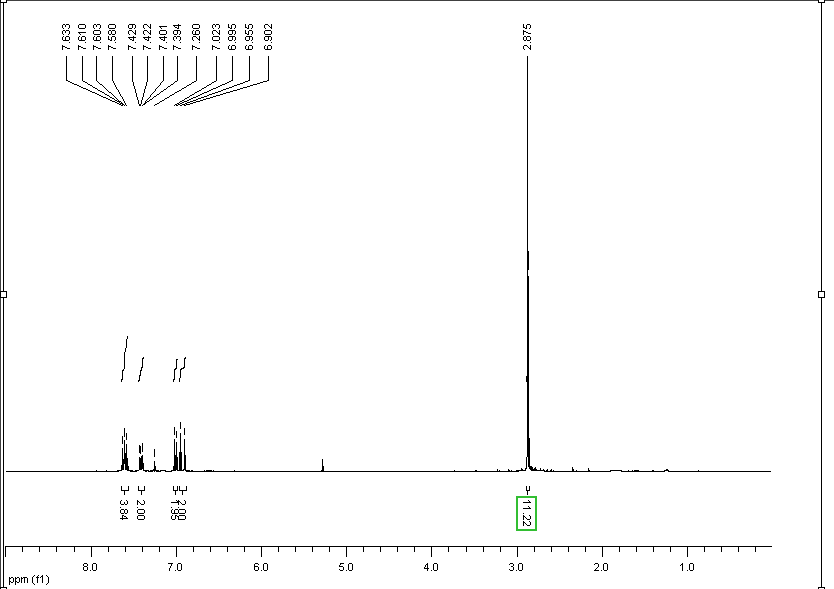


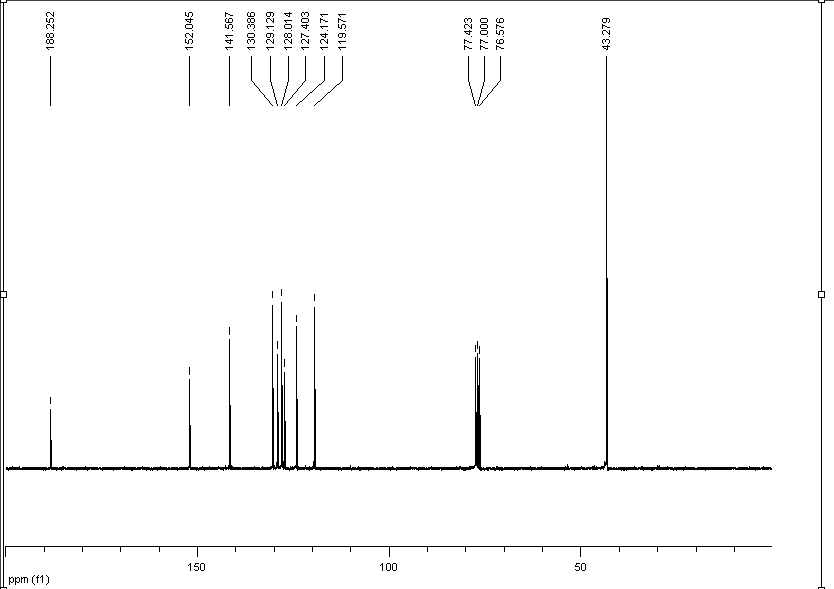


### (1*E*,4*E*)-1,5-Bis[3-bromo-4-(dimethylamino)phenyl]penta-1,4-dien-3-one (1c)


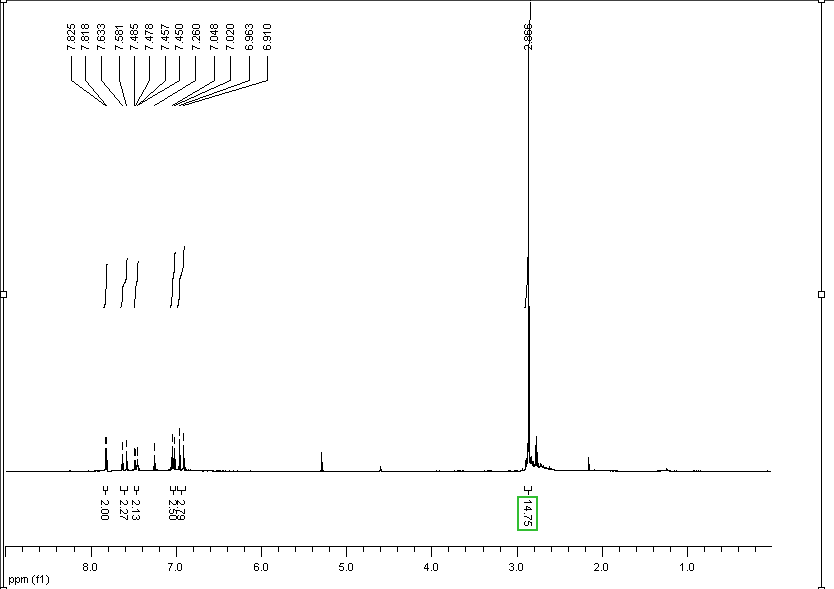


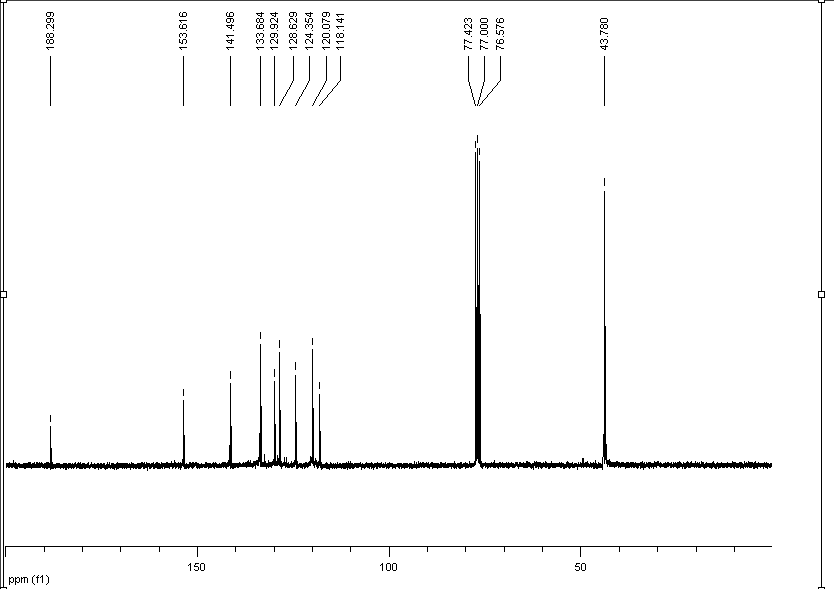


### (2*E*,6*E*)-2,6-Bis[4-(dimethylamino)benzylidene]cyclohexanone (2a)


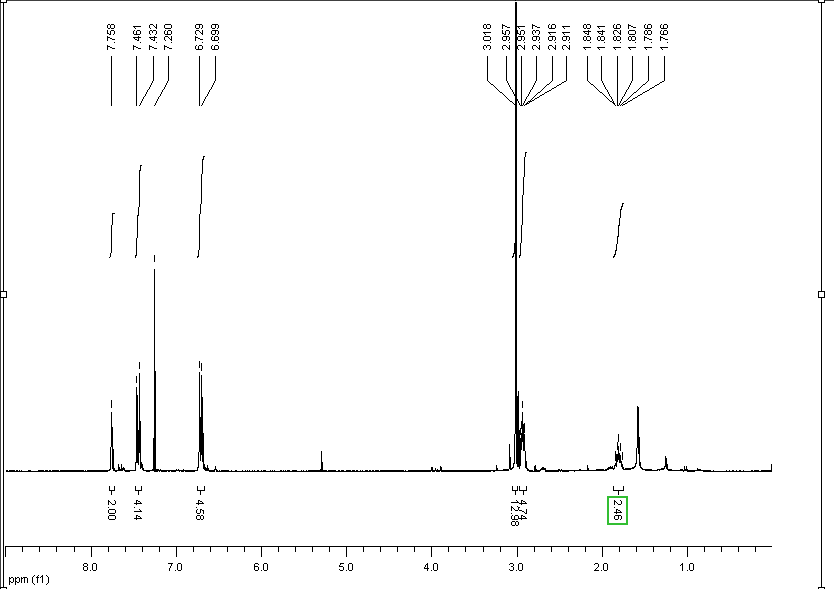


### (2*E*,6*E*)-2,6-Bis[3-chloro-4-(dimethylamino)benzylidene]cyclohexanone (2b, Liprobe)


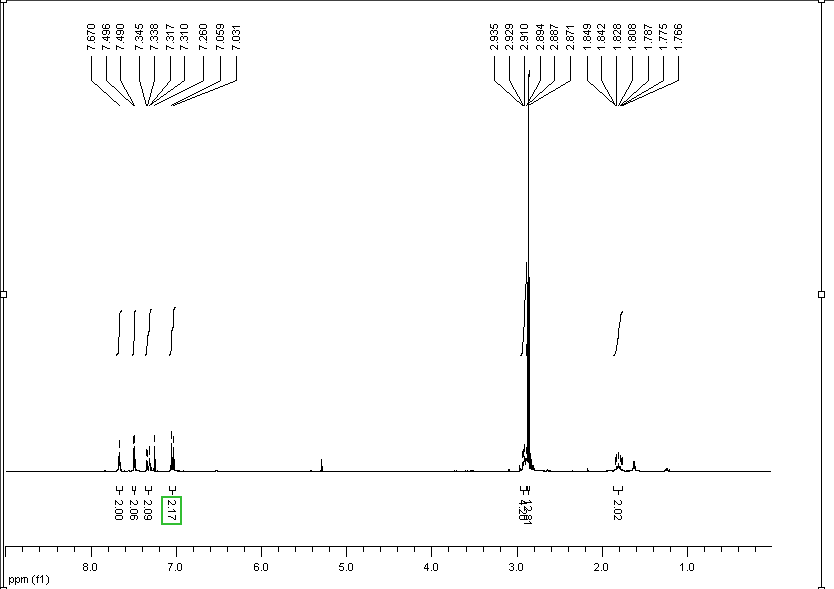


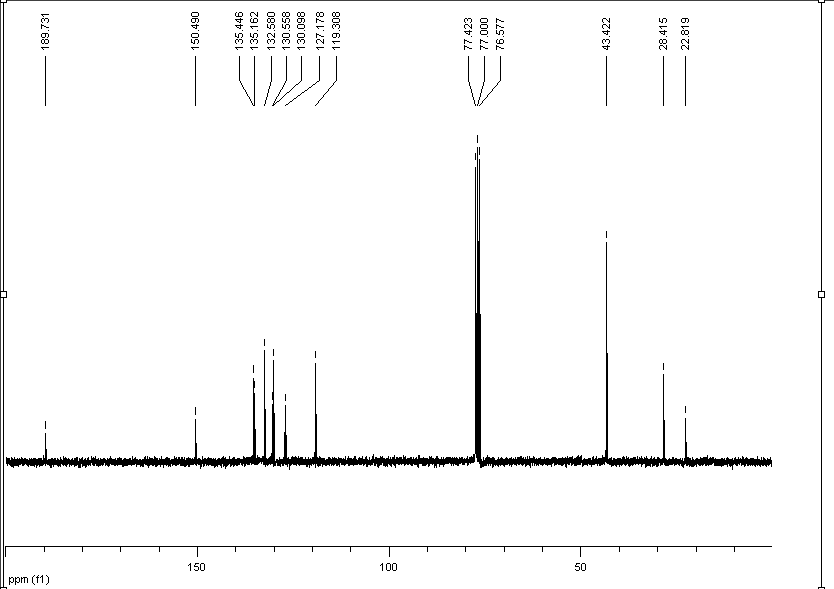


### (2*E*,6*E*)-2,6-Bis[3-bromo-4-(dimethylamino)benzylidene]cyclohexanone (2c)


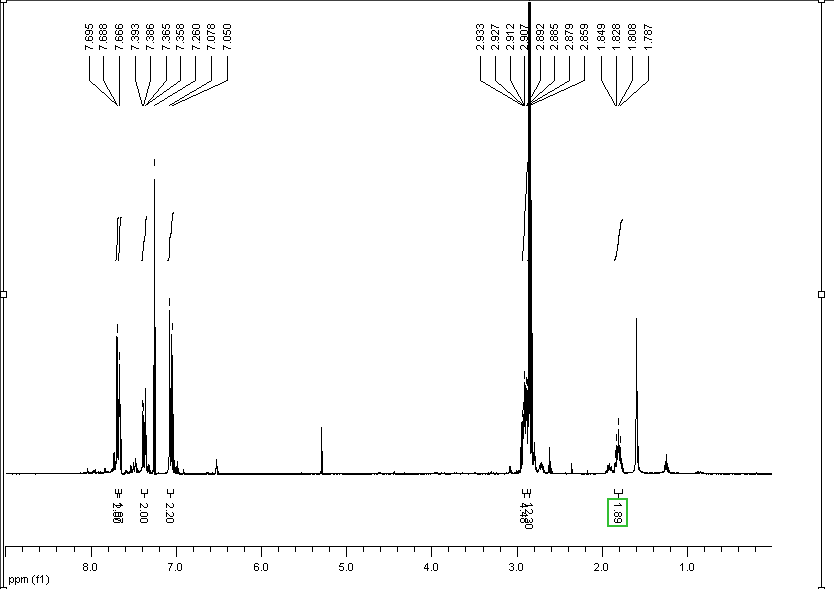


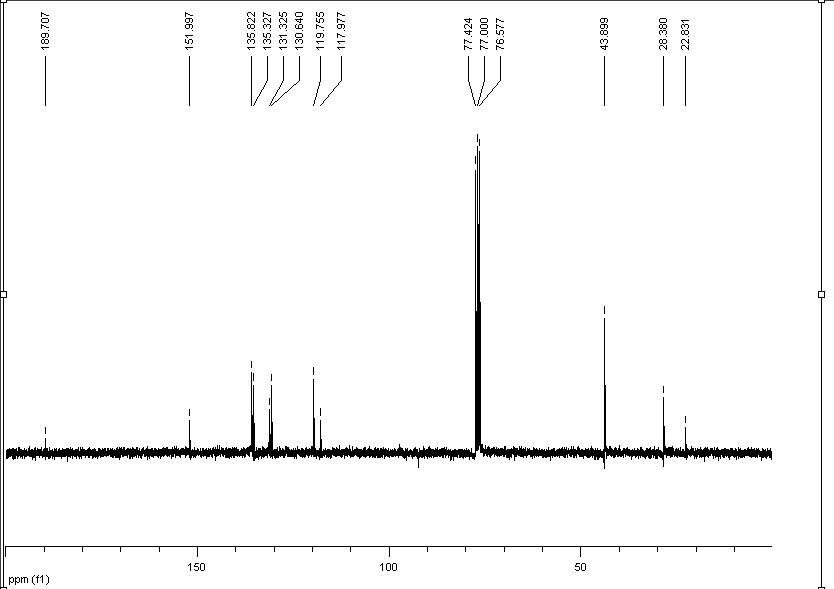


# Supplementary figures, material and methods for the Biological Part

## Supplementary Figures S1-S6

**Figure S1.** Confocal microphotographs with the distribution and relative intensities of 10-20 μM of the cyclic fluorophores internalized for 1h by living HeLa cells. Excitation was performed with the indicated laser (e.g. **2a** excited with 458 nm line at 100% power), and 518-754 nm emission (green-red regions) collected with a META detector. Compounds were given artificial orange and red staining to increase contrast with the nuclear blue DAPI counterstain (em. 420-480 nm). At 458 nm excitation, fluorescence intensities decreased as follows: **2b** > **2c** > **2a**. Laser 405 nm at 10% was sufficient to efficiently excite compound **2b**. Of note, the lasers of the 510 META LSM Zeiss confocal microscope were at more than half of their lifetime, and these laser powers will certainly decrease in younger microscopes.Bar, 20 μm.


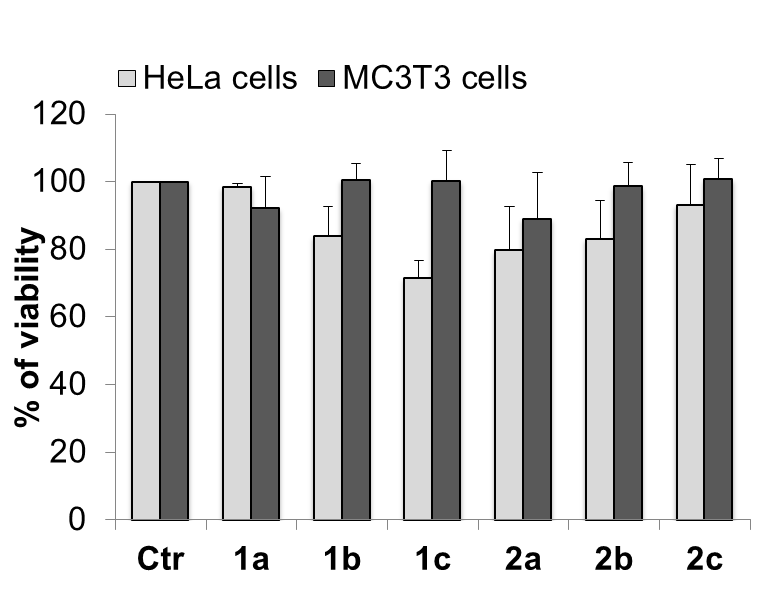


**Figure S2.** Metabolic viability resazurin assay of living rat MC3T3-E1 and human HeLa cells exposed to 1x10-6 mol.L-1 of the developed push-pull fluorophores for 24 h. Results are presented as resazurin O.D. mean ± SD, N = 4. Statistical significance using one-way Anova followed by the Dunnett test: *p<0.05; ***p<0.001.

**Figure S3.** Imaging of compound **2b** (20 μM) in living mammalian cultured cells (Fig. 2 and 3 complementary data).(**A**) Confocal microphotographs of compound **2b** fluorescence intensity and distribution in live HeLa cells upon 24 h of exposure (exc. at 405 nm; yellow artificial colour); these cells were used in the metabolic assays of Fig. S2. (**B**) Same conditions as in (**A**) but imaged in lambda scan mode, revealing different emission colours (green, yellow, red) pending on the subcellular region. Bar, 50 μm. (**C**) Lambda scans and microphotographs of mammalian cell lines not exposed to **2b** (negative controls of Fig. 3). Bar, 20 μm.

**Figure S4.** Biocompatibility and imaging in mammalian cultured cells (Fig. 2 complementary data - emission lambda scans of the fluorophores **1b**, **1c**, **2a** and **2c**). HeLa cells were incubated for 1h with 20 μMof the indicated fluorophore, and were imaged in lambda scan mode (exc. 405 nm; em. 411-754 nm).

**Figure S5.** Negative microphotographs controls for the assay of cells overnight incubation with oleic acid (Fig. 5C complementary data).Images of cells incubated overnight with oleic acid (prepared in bovine serum albumin, BSA) or only with the carrier BSA solution, but not exposed to compound **2b** thereafter. Excitation at 405 nm, autofluorescence em. 500-750 nm); DAPI em. 415-480 nm (blue nuclear staining). Bar, 10 μm.

**Figure S6.** Microphotographs of compound **2b** staining of human control fibroblasts (‘Ctrl FIB’) and of Farber’s disease fibroblasts engineered to overexpress acid ceramidase. (‘Farber’s FIB CER’).The fatty acids products of the high ceramide breakdown are still detected by compound **2b**. (**A**) Fibroblasts exposed to 20 μM compound **2b**; imaging settings used were as the ones in panel (**B**), Negative control fibroblasts of panel **A**, not incubated with compound **2b**; imaging settings were normalized to eliminate fibroblasts’ auto-fluorescence. Exc. 405 nm, red em. 572-754 nm, green em. 505-565 nm, blue em. 420-480 nm. Bar, 10 μm.

## Compounds’ cellular fluorescence and distribution (HeLa cells)

The human immortalized HeLa cell line, derived from cervical cancer, was cultured in Dulbecco’s Modified Eagle’s Medium (DMEM) (Gibco, Invitrogen) supplemented with 1% (v/v) Non-Essential amino acids (Gibco, Invitrogen), 10% (v/v) heat inactivated Fetal Bovine Serum (FBS) (Gibco, Invitrogen) and 1% (v/v) antibiotic/antimycotic mix (Gibco, Invitrogen). Cultures were maintained at 37 °C under 5% CO2 in a humidified incubator. Cells were plated on glass coverslips-containing 6-wells culture plates (9.6 cm2) until 60% confluence was reached, and incubated for the indicated periods (1h - 3 days) with 10-20 µM of the fluorophores. Upon washing with phosphate buffer saline (PBS), (Pierce, Perbio, Thermo Scientific, Bonn, Germany) cells were fixed with 4% formaldehyde (FA) (Sigma-Aldrich), and directly mounted on slides with Vectashield® antifading-reagent, containing or not DAPI for nucleic acid staining (Vector Laboratories). Fluorescence microscopy was carried out in a LSM-510 META confocal microscope (Zeiss, Germany) using as excitation source for the fluorophores either the Diode 405 nm laser line or the 458 nm Argon laser. Images were acquired with a PlanNeofluor 40x/1.3 oil immersion objective, using as light paths: 1) HFT 405/488/561, NFT 565 and NFT 490, filters: BP 420-480 nm for DAPI, LP 505 nm; and 2) HFT 405/488/561, NFT 515 (compound **1a**) and the META detector dedicated to the other fluorophores (518-754 nm). Fig. S1 exemplifies the subcellular distribution of the cyclic fluorophores. Of note, the fluorescence intensity of the compounds was found to be stable in unmounted coverslips stored in PBS for more than one month. Further, the fluorophores in powder were stable for more than one year.

## Cytotoxicity assays

The human HeLa cell line and the osteoblastic cell line MC3T3-E1 (ATCC, Barcelona, Spain; CRL-2593) were used to assess the fluorophores’ cytotoxicity. HeLa cells were prepared as described above, and MC3T3-E1 cells maintained at 37 °C in a humidified atmosphere of 5% CO2 in air, in 2 mM Glutamine-containing Minimum Essential α-Medium in EBSS (Eagle’s Balanced Salt Solution) supplemented with 10% (v/v) FBS, 1% (v/v) of a 100 mg mL-1 penicillin and 100 mg mL-1 streptomycin solution (Gibco BRL, Invitrogen) and 3.7 g L-1 NaHCO3. Sub-confluent cultures (80-90% confluence) were split 1:5 using a 0.25% trypsin/EDTA (Gibco BRL, Invitrogen) solution at 5% CO2, 37 °C. Live cells at c.a. 60% confluence were incubated for 24 h with 1 µM media solutions of the fluorophores in DMSO, the vehicle used in control conditions (at 0.1%). The resazurin metabolic assay was used to assess cytotoxicity. Briefly, in the last 4 h of the 24 h incubation period, a resazurin (Sigma-Aldrich) solution (0.1 mg mL-1 resazurin in PBS was added to the cells’ media until a final 10% solution. Reduction of resazurin to resofurin in the cells’ media was spectrophotometrically measured at 570 and 600 nm (Infinite M200 PRO, Tecan), and the final O.D. calculated [[[8]](#endnote-8)]. Data was plotted as percentage of the control cells (no fluorophores) final O.D., and microphotographs were taken at the end of the assay.

## Confocal lambda scans in HeLa cells

Emission spectra of the fluorophores were analysed with the META detector of a Zeiss 510 confocal microscope in Lambda mode, which registers emissions from 411 to 754 nm in 10.7 nm intervals, upon excitation with the 405 nm laser line of the Diode 405-430 laser at 15-30 % of its power (HFT 405/488/633). Microphotographs of emission spectra were acquired with the 40x/1.3 oil objective. Quantitative data was obtained with the Zeiss LSM 510 4.0 software and used to construct emission spectra profiles. At daily used laser potencies (10-30% power) the fluorophores were only clearly visible with the 405 nm laser line. Of all the other laser lines tested (458, 477, 488, 514, 561, 633 nm), only the 458 nm line was able to visibly excite the fluorophores and only near or at its full potency (100%).

## Compound 2b staining in different mammalian cell lines

The following cell lines were used and maintained in a 5% CO2 humidified incubator at 37 °C. Cells were sub-cultured when a cell density of 90% was achieved, and medium exchanged twice a week: The human HeLa cell line and the pre-osteoblastic MC3T3-E1 cell line were maintained as described above. The human SH-SY5Y neuroblastoma cell line (ATCC CRL-2266) [[[9]](#endnote-9)] was maintained in minimum essential media/F12 (1:1) (Gibco BRL, Invitrogen) medium supplemented with 10% (v/v) FBS and 1% (v/v) of the above-mentioned antibiotic–antimycotic. The MG63 pre-osteoblastic human cell line [[[10]](#endnote-10)] derived from human osteosarcoma cells (ATCC CRL-1427), was cultured in Eagle’s Minimum Medium in EBSS supplemented with 1% NEAA (Non-Essential Amino Acids) (Gibco BRL, Invitrogen), 2 mM L-Glutamine (Gibco BRL, Invitrogen), 10% (v/v) FBS, 1% (v/v) of the penicillin-streptomycin antibiotic–antimycotic solution, and 3.7 g L-1 NaHCO3. Cell lines of skin fibroblasts from control individuals, from a Farber disease patient [FD, fibroblasts transformed by the human simian virus 40 (SV40) large T antigen] and from FD fibroblasts overexpressing acid ceramidase (AC) [FD transformed fibroblasts, transfected with a recombinant retroviral vector cloned with human ASAH1/cDNA], were kindly provided by Prof. Thierry Levade (Laboratoire de Biochimie Métabolique, Institut Fédératif de Biologie, CHU Purpan, Toulouse, France) and previously described [[[11]](#endnote-11),[[12]](#endnote-12)]. Both cell lines were cultured in DMEM, supplemented with 10% heat inactivated FBS and 1% antibiotic/antimycotic mix. After trypsinization the cells were washed with cold PBS and the pellet was frozen at −20 °C or immediately processed. Cells were plated on glass coverslips in culture plates (21 cm2) until c.a. 60% confluence was reached, and incubated or not for 2 h with 20 µM of fluorophore **2b**. Upon washing with PBS, cells were fixed with 4% FA, and directly mounted on slides. Lambda scans were taken as above.

## Co-localization of compound 2b with MitoTracker and LAMP2

The human HeLa cell line was used to assess the co-localization of the fluorophore **2b** with the lysosomal marker LAMP2 (stained red with AlexaFluor647) and with a viable mitochondrial marker Mitotracker Deep Red FM 633 nm. HeLa cells were prepared as described above. For Mitotracker co-staining, live cells at c.a. 60% confluence were incubated for 30 min with 250 nM Mitotracker in FBS- and antibiotic/ antimycotic-free DMEM. After proper washes with PBS-T, cells were further incubated for 2 h with a 20 µM **2b** solution in DMEM. Cells incubated with 0.1% DMSO (the **2b** vehicle used) were used as negative control. Cells were fixed with 4% FA and mounted on slides with the Vectashield® antifading-reagent. For LAMP2 co-staining, live cells at c.a. 60% confluence were incubated for 2 h with 20 µM of fluorophore **2b** in cell media. Cells were fixed with 4% FA and permeabilized with 0.2% Triton in PBS for 30 min. After washes with PBS, cells were blocked with 3% BSA (in PBS-T) for 1 h, incubated for 2 h with an antibody against the lysosomal marker LAMP2 (1:50), washed with PSB-T, further incubated for 1 h with an AlexaFluor647-labeled anti-mouse secondary antibody (1:300), and mounted on slides with the antifading-reagent. Images z-stacks were taken under a Zeiss LSM 880 AiryScan confocal microscope (Carl Zeiss, Jena, Germany) and using the following settings: fluorophore **2b**, excitation at 405 nm and emission collected at 510-600 nm; Mitotracker and LAMP2, excitation at 633 nm and emission collected at 650-750 nm.

## Induction of lipid droplets by oleic acid incubation

HeLa cells and control human fibroblasts were cultured as above until 60% confluence and incubated overnight with DMEM plus oleic acid (OA, Merck) at final concentration of 400 mM. OA solution was prepared from a stock of 20 mM OA in NaOH and 5% BSA in PBS, at an 8:1 OA/BSA ratio). On the next day, compound **1a** at 10 µM was incubated for 2 h with the live cells. Upon washing with PBS, cells were fixed with 4% FA, permeabilized with Triton 0.2% and washed three times with PBS. Confocal lambda scans were taken as above.

## Zebrafish biocompatibility and staining with compound 2b

Zebrafish (*Danio rerio*) embryos were produced, grown and maintained according to standard protocols approved by the Stanford University Institutional Animal Care and Use Committee (ethical approval body). Embryos from wildtype (TL, AB/TU, and WIK) backgrounds were raised at 28.5 °C, and staged by established standards [[[13]](#endnote-13)]. From 20 hpf (hours post-fertilization) onwards embryos were treated with 0.003% 1-phenyl-2-thiourea (PTU) in methylene blue embryo water to inhibit pigmentation. To determine the toxicity of compound **2b**, zebrafish embryos (n=30-40) were treated at 4 days post-fertilization (dpf) with different concentrations (10-50 µM) of compound **2b** for various periods of time (4-16 h). For each treatment, all treated embryos were examined under a dissection stereoscope and the number of embryos displaying gross morphologic defects or lethality was recorded. To determine if compound **2b** was internalized and detected in zebrafish embryos, embryos at 4.5 dpf were treated for 16 h with 50 µM compound **2b** in DMSO (a DMSO alone condition was performed in parallel, as negative control). Embryos were washed three times in fresh embryo media to remove traces of DMSO and compound **2b**. Fish were imaged 2-6 h later. For imaging, zebrafish were mounted in 1.5% low melting point agarose. Images of the trunk at the level of the urogenital pore were captured using Zeiss LSM700 confocal microscope and a Plan-Neofluar 20× objective. Lambda scan settings used were as follows: 405 nm excitation at c.a 40% power; pinhole: 68 m; filters 520-610, MBS 405/488/555/639.

## Quantification of triglycerides in solution

For the standard curve, a 200 mg dL-1 (in acetone) stock solution of a triglyceride (TG) mix (Sigma Aldrich cat# 17811-1AMP) was prepared and used in serial dilutions in deionized water to prepare standards in the 0-20 mg dL-1 concentration range. To each standard, 20 µM of **2b** was added. Diluted TG standards (100 µL, in technical duplicates) were added to a 96-well fluorescence microtiter plate, protected from light and incubated for 5 min at room temperature. The **2b** fluorescence emission in the 412-600 nm range was recorded in a Tecan Infinite® 200 microplate reader, after excitation at 375 nm.

## High-Content Screening of human fibroblasts

Human skin fibroblasts from control individuals and from Farber disease patients (FD) were cultured as described above, on 96-well plate (Corning® 96 Well Black Polystyrene Microplate) randomly, until 60% confluence was reached. After 2 h of cells being plated, half of the wells with skin fibroblasts from control individuals were incubated with oleic acid at 400 µM overnight prepared as above. On the next day, **2b** at 20 µM was incubated for 2 h. Upon washing with PBS, cells were fixed with 4% FA, permeabilized with Triton 0.2% and washed three times with PBS. Finally, the cells were incubated with HCS Cell Mask Deep Red Stain (Invitrogen) for 30 min at room temperature and washed three times with PBS. Cells were stored at 4 ºC and transported in a refrigerated recipient. High-content screens were conducted in an In Cell Analyzer 2000 (GE Healthcare). **2b** fluorophore was excited with CFP laser (ex. 400-440 nm) and the emitted fluorescence was also collected at CFP region (em. 460-490 nm). The data was analysed with Ilastik 1.3.2. and CellProfiler, and statistical analysis was conducted with GraphPad Prism v.7.0.

## Mass spectrometry analysis of the proteome of cells exposed to compound 2b

The effects of compound **2b** in cellular pathways was indirectly assessed by monitoring alterations in the proteome of cells incubated for 24 h with compound **2b**, via mass spectrometry (nanoLC-MS/MS). Normal human skin fibroblasts were cultured in 10 cm dishes as above, until reaching 80% confluency. Cells were washed with PBS and incubated in complete DMEM plus 20 μM compound **2b** for 24 h. In parallel, a dish with fibroblasts was incubated only in complete DMEM (control). After incubation, fibroblasts were washed with PBS and collected by scraping in 500 μL ice cold PBS plus a cocktail of protease inhibitors. Cells suspension was sonicated (3x 20 pulses). Duplicates of 5 μL aliquots per sample were used for total protein quantification (BCA assay, Pierce). Samples were instantly frozen in liquid nitrogen and stored at –30 ºC until further processing.

A comparative proteomic analysis was performed as previously,[[14]](#endnote-14) by nano Liquid Chromatography (LC) associated to tandem Mass Spectrometry (MS) (nanoLC-MS/MS). Cellular lysates were treated with DTT, iodoacetamide and trypsin for the respective proteins’ reduction, alkylation and enzymatic digestion. The obtained peptides were then separated by LC (nanoUHPLC) performed in an Ultimate 3000 system (Thermo Scientific) with a nanoESI (electrospray ionization) source coupled to a high-resolution accurate mass spectrometer (Q-Exactive Hybrid Quadrupole-Orbitrap, Thermo Scientific). For NanoUHPLC, samples were loaded onto a trapping capillary column Acclaim PepMap C18 100A˚ [3 µm particle size, 300 µm internal diameter (i.d.) x 5 mm, 160454, Thermo Scientific] with a mobile phase of 2% acetonitrile (ACN), 0.1% formic acid (FA) at 10 μL/min. After loading for 3 min, the column was switched to an EASY-Spray column (ES800, PepMap RSLC, C18, 3 μm particle size, 75 µm i.d. x 15 cm, Thermo Scientific) at 300 nL/min. Samples were eluted using both solvent A (0.1% FA) and solvent B (80% ACN), following a linear gradient: 22 min (2.5% B to 50% B), 5 min (50% B to 95% B), 10 min (hold 95% B). Nanospray was performed by an uncoated fused silica emitter (New Objective, Cambridge, MA) (diameters: outer 360 μm, inner 50 μm; tip inner diameter 15 μm) biased to 1.9 kV. A data dependent (dd) acquisition mode was used to operate the mass spectrometer switching between a full scan from *m/z* 300 to 2000 (resolution 70,000; automatic gain control (AGC) target 3E6; max. injection time 100 ms) and subsequent fragmentation of the 10 most intense peaks through high-energy collisional dissociation (HCD) MS/MS (microscans 1; resolution 17,500; AGC target 1E5; normalized collision energy (NCE) 27%; max. injection time 100 ms; isolation window 2.0 *m/z*; isolation offset 0.0 *m/z*; spectrum data type profile). dd settings: minimum AGC target 1E3; intensity threshold 1E4; charge exclusion: unassigned, 1, 5–8, >8; peptide match preferred; exclude isotopes on; dynamic exclusion 20 s. The Proteome Discoverer 2.2.0.388 software (Thermo Scientific) was used to identify the proteins by comparison with the UniProt database (*Homo sapiens* proteome). The Sequest HT search engine was used to identify the tryptic peptides. The ion mass tolerance was defined at 10 ppm for precursor ions and 0.02 Da for-fragment ions. Two missing cleavage sites were allowed, as maximum. Cysteine carbamidomethylation was defined as constant modification, and methionine oxidation and protein N-terminus acetylation as variable ones. Peptide confidence settings were defined as high. The processing node Percolator’ settings were the following: maximum delta Cn 0.05; decoy database search target FDR 1%, validation based on q-value. From the complete set of ID’d proteins, most abundant proteins were selected by a minimum of 2 peptides present and the highest sum-pep score. The protein expression levels were quantified using label-free methodologies. Using a Volcano plot analysis, proteins whose levels were considered altered in cells exposed to Liprobe (p-value < 0.05) were identified and assigned to two groups, one of up-regulated (UREG) and the other of down-regulated (DREG) proteins, considering abundance ratios ≥ 2 or ≤ 0.5, respectively.

## Long-term 2b intracellular staining and its effects on cells viability

The long-term maintenance and visibility of compound **2b** in HeLa cells, and its effects on the cells’ viability, were monitored. HeLa cells, cultured as described above unto c.a. 60% confluence, were incubated for 2 h with 20 µM media solutions of compound **2b** in DMSO (at 0.1%). After 2 h incubation, cells were washed with PBS and the media was changed. Cultures were maintained for 3 days at 37 °C under 5% CO2 in a humidified incubator. The resazurin metabolic assay was used to assess cellular viability, as above described. Data was plotted as percentage of the final O.D. of control cells (no fluorophores) and microphotographs were taken at the end of the assay in a Zeiss LSM 880 with Airyscan confocal microscope (Zeiss, Germany), with the 405 nm laser.

# References

1. APEX2, Data Collection Software Version 2.1-RC13, Bruker AXS, Delft, The Netherlands 2006. [↑](#endnote-ref-1)
2. Cryopad, Remote monitoring and control, Version 1.451, Oxford Cryosystems, Oxford, United Kingdom 2006. [↑](#endnote-ref-2)
3. SAINT+, Data Integration Engine v. 7.23a© 1997-2005, Bruker AXS, Madison, Wisconsin, USA. [↑](#endnote-ref-3)
4. G. M. Sheldrick, SADABS v.2.01, Bruker/Siemens Area Detector Absorption Correction Program 1998, Bruker AXS, Madison, Wisconsin, USA. [↑](#endnote-ref-4)
5. G. M. Sheldrick, Acta Cryst. A, 2008, 64, 112-122. [↑](#endnote-ref-5)
6. G. M. Sheldrick, SHELXS-97, Program for Crystal Structure Solution, University of Göttingen 1997. [↑](#endnote-ref-6)
7. G. M. Sheldrick, SHELXL-97, Program for Crystal Structure Refinement, University of Göttingen 1997. [↑](#endnote-ref-7)
8. S. Pina, S. I. Vieira, P. M. C. Torres, F. Goetz-Neunhoeffer, J. Neubauer, O. A. B. da Cruz e Silva, E. F. da Cruz e Silva, J. M. F. Ferreira, In vitro performance assessment of new brushite‐forming Zn‐ and ZnSr‐substituted β‐TCP bone cements, J. Biomed. Mater. Res. B. Appl. Biomater. 94 (2010) 414-420. [↑](#endnote-ref-8)
9. S. A. Martins, P. D. Correia, R. A. Dias, O. A. B. da Cruz e Silva, S. I. Vieira, CD81 promotes a migratory phenotype in neuronal-like cells, Microsc. Microanal. 25 (2019) 229-235. [↑](#endnote-ref-9)
10. C. F. Marques, A. Lemos, S. I. Vieira, O. A. B. da Cruz e Silva, A. Bettencourt, J. M. F. Ferreira, Antibiotic-loaded Sr-doped porous calcium phosphate granules as multifunctional bone grafts, Ceram. Int. 42 (2016) 2706-2716. [↑](#endnote-ref-10)
11. M. Chatelut, J. Feunteun, K. Harzer, A. H. Fensom, J. P. Basile, R. Salvayre, T. Levade, A simple method for screening for Farber disease on cultured skin fibroblasts, Clin. Chim. Acta 245 (1996) 61-71. [↑](#endnote-ref-11)
12. J. A. Medin, T. Takenaka, S. Carpentier, V. Garcia, J. P. Basile, B. Segui, N. Andrieu-Abadie, N. Auge, R. Salvayre, T. Levade, Retrovirus-mediated correction of the metabolic defect in cultured Farber disease cells, Hum. Gene Ther. 10 (1999) 1321-1329. [↑](#endnote-ref-12)
13. C. B. Kimmel, W. W. Ballard, S. R. Kimmel, B. Ullmann, T. F. Schilling, Stages of embryonic development of the zebrafish, Dev. Dyn. 203 (1995) 253-310. [↑](#endnote-ref-13)
14. B. A. Miller, A. Chapwanya, T. Kilminster, T. Scanlon, J. Milton, H. Osório, C. Oldham, J. Greeff, D. R. Bergfelt, A. M. O. Campos and A. M. Almeida, PLoS One, 2019, 14, 1–15. [↑](#endnote-ref-14)
